# Supplementary material for: 3D-Beacons: decreasing the gap between protein sequences and structures through a federated network of protein structure data resources
Source: PubMed Central journal article supplement (PMC9709962; doi:10.1093/gigascience/giac118), 2022-11-30
Supplement: giac118_response_to_reviewer_comments_revision_2.pdf [file giac118_response_to_reviewer_comments_revision_2.pdf]

## Author's Response To Reviewer Comments

Close

Please find the requested reformatting in the revised document.

Close
